1 **Sexually transmitted infection knowledge levels, socio-demographic characteristics and**  
2 **sexual behaviour among men who have sex with men: results from a cross-sectional**  
3 **survey in Nairobi, Kenya.**

4 **Delvin Kwamboka Nyasani<sup>1,2</sup>, Meshack Onyambu<sup>1</sup>, Laura Lusike Lunani<sup>2</sup>, Geoffrey**  
5 **Oino Ombati<sup>1</sup>, Gaundensia Nzembi Mutua<sup>3</sup>, Matt Price<sup>3, 4</sup>, Justus .O.Osero<sup>1</sup>**

6 1 Kenyatta University Department of Community Health and Epidemiology, Nairobi, Kenya  
7 2 KAVI Institute Of Clinical Research, University Of Nairobi, Nairobi, Kenya. 3. IAVI, New  
8 York, United States of America. 4 Department of Epidemiology and Biostatistics, University  
9 of California , San Francisco, California, United States of America.

10

11 Corresponding author, email: [dnyasani@kaviuon.org](mailto:dnyasani@kaviuon.org) or dnyasani01@yahoo.com

12 **Abstract**

13 **Background:**

14 High rates of sexually transmitted infections (STIs) among men who have sex with men  
15 (MSM) have been reported, there is little research on their STI knowledge. Our study sought  
16 to characterize knowledge and awareness of STIs among MSM in Nairobi, Kenya.

17 **Methods**

18 We mobilized MSM aged  $\geq 18$  years from Nairobi into a cross-sectional study. To determine  
19 their understanding about STIs, a pre-tested structured questionnaire was administered.  
20 Knowledge score was generated by summing up the number of responses answered correctly  
21 by a participant. We dichotomized scores as “low” and “high”, by splitting the group at  $< 12$   
22 and  $\geq 12$  which was the mean.

23 **Results**

24 A total of 404 participants were interviewed between the month of March and August 2020.  
25 The mean age was 25.2 (SD=6.4) years. Majority were single (80.4%) and Christians  
26 (84.2%). All participants had some formal education ranging from primary to tertiary; the

**NOTE: This preprint reports new research that has not been certified by peer review and should not be used to guide clinical practice.**

27 majority (92.3%) had secondary education or more. Most (64.0%) were employed and their  
28 monthly income ranged from <50->150 USD. Almost all (98.5%) were Kenyans.  
29 Of the 404 (90.6%) self-identified as male and (47.5%) reported to be exclusively top  
30 partners. Many (39.9%) reported being both bottom and top, while those reporting to be  
31 bottom partners were, (12.6%). The last 12 months, (55.4%) of the participants reported  
32 having sex with men only and (88.6%) reported to have had more than one sexual partner.  
33 Participants scored an average of 12.2, out of 29 SD 4.5. The multivariable modelling  
34 revealed that participants aged  $\geq 25$  years were more likely to have a higher knowledge score  
35 compared with the participants aged 18-24 years (aOR=0.973, CI: 0.616-1.538). Regarding  
36 education and occupation, participants who had tertiary education and those who were  
37 employed were more likely to have a higher knowledge score compared with the participants  
38 who had primary education and were not employed ( aOR=2.627, CI:1.142-6.043)  
39 (aOR=0.922, CI:0.401-2.117). Participants who were earning (USD >150) were more likely  
40 to have a higher knowledge score compared to the ones who were not earning (aOR=2.520,  
41 CI: 0.900-7.055). Further bisexual men were more likely to have a higher knowledge score  
42 compared with the participants who were having sex with men only ( aOR= 1.550, CI: 1.026-  
43 2.342)

#### 44 **Conclusion**

45 Participant's knowledge level regarding STIs was low. We recommend health care workers  
46 to continue educating patients about STIs.

47

48

49

50

51

52 **Introduction**

53 **Background**

54 Over 1 million sexually transmitted infections (STIs) are acquired daily globally; common  
55 among them are chlamydia, gonorrhoea, syphilis and trichomoniasis. Many of these  
56 infections are frequently mild or asymptomatic (1) In low- and middle-income countries  
57 (LMICs), symptomatic STIs are often treated by syndromic management which frequently  
58 misses asymptomatic STIs that therefore remain untreated and potentially infectious (2).  
59 Regardless of symptoms, STIs can cause serious morbidity including cancer, infertility, and  
60 enhanced HIV transmission (3,4).

61

62 Prevalence rates of STIs vary from area to area, nation to nation and between urban and rural  
63 populations. The infections are more prevalent in Asia and sub-Saharan Africa (SSA), but  
64 SSA is estimated to contribute a greater proportion of the cases of STIs every year,  
65 highlighting a need for intervention (5).

66

67 The impact of STI epidemics is of particular importance among key, higher-risk populations  
68 who include: young people and adolescents, men who have sex with men (MSM), people in  
69 prisons, sex workers and people who inject drugs. These populations are often vulnerable to  
70 both HIV and other STIs not only because of their high-risk sexual and drug use behaviours,  
71 but also by structural barriers such as low access to quality health services, stigma and  
72 discrimination(6).

73 The risk may even be even greater among MSM because unprotected receptive anal sex; is a  
74 greater risk factor for STI and HIV acquisition than unprotected vaginal sex (7).

75 In developed countries such as United States, England and Netherlands the data as also  
76 shown that MSM bear a much higher burden of new cases of STI and HIV than their  
77 heterosexual male counterparts (8–11)

78 The situation is similar in Africa, where increasing attention has been spent describing the  
79 epidemiology of STIs and HIV among MSM in recent years. In Uganda, a study conducted  
80 among 300 MSM, found that they had a higher HIV prevalence 13.7% compared to the  
81 general adult male population at 4.5% (12).

82 In Kenya, a study conducted in Nairobi among 563 male sex workers and other MSM found  
83 that the prevalence of testing positive for one or more STIs combined (Syphilis, gonorrhoea  
84 or chlamydia) among male sex workers was higher (15.0%) compared to those who were not  
85 sex workers (5.3%) (13). Also according to (14) among the estimated 22,000 MSM in  
86 Kenya, the HIV prevalence was 18.2% compared to the national general population at 5.9%.

87  
88 According to (15) comprehensive HIV and AIDS knowledge among sexually active men had  
89 reduced the odds of them contracting STIs. Being that the HIV prevalence among MSM in  
90 Kenya is estimated to be three times higher than that of the general population, we sought to  
91 characterize knowledge and awareness of STIs among MSM in Nairobi City County, Kenya.

92  
93  
94  
95  
96  
97  
98  
99

100 **Materials and Methods**

101 **Study design**

102 This was a cross-sectional study among sexually active MSM within Nairobi, Kenya,  
103 conducted between the months of March-August 2020. We interviewed participants to  
104 determine their understanding of STIs and assessed for association with socio-demographic  
105 characteristic and sexual behaviour.

106 **Study participants**

107 The study was designed to enrol men aged  $\geq 18$  years and who have sex with men from  
108 places where MSM are known to either solicit their clients or where sexual activity was  
109 common including “cruising” areas along streets, or bars with or without lodging (16).  
110 They had to be willing and able to give informed consent to participate. MSM who were  
111 obviously intoxicated were excluded from participation.

112

113 **Participant recruitment**

114 Mobilization was done by MSM community mobilizers. We identified MSM community  
115 mobilizers from the Nairobi-based Sex Workers Outreach Programme (SWOP) with whom  
116 we had partnered for a recent study (17). The community mobilizers gave a brief description  
117 of the research activities to potential participants. Then using a systematic random sampling  
118 procedure they selected participants with the desired characteristics. A systematic random  
119 sampling is a sampling technique that the researcher selects participants to be included in the  
120 sample based on a systematic rule, using a fixed interval.

121 We had twenty one days to enrol 422 participants. We had purposively selected 5 sub-  
122 counties that were densely populated with MSM(16). To get the percentage of the  
123 participants to be accessed from each sub-county, the researcher took the expected number in  
124 a specific sub-county divided by the total participants from all the 5 sub-counties and  
125 multiplied by 100. Then to get the numbers to be recruited from each sub county, it was the

126 percentage of the participants to be accessed from each sub-county multiplied by the required  
 127 number of participants (n=422) (Table 1).

128 Table 1: The Number of MSM in the selected Sub-Counties, at selected MSM geographic  
 129 areas In Nairobi, Kenya and the sampled population.

130

| <b>Sub-County</b>      | Estimated number of MSM available on all selected MSM geographic areas | Percentage of the total MSM to be accessed | Number of MSM required for the study ((n=422) |
|------------------------|------------------------------------------------------------------------|--------------------------------------------|-----------------------------------------------|
| <b>Starehe</b>         | 2000 (40 MSM geographic areas)                                         | 55%                                        | 232                                           |
| <b>Westlands</b>       | 1000 (27 MSM geographic areas )                                        | 27%                                        | 114                                           |
| <b>Dagoretti South</b> | 360 (20 MSM geographic areas)                                          | 10%                                        | 42                                            |
| <b>Ruaraka</b>         | 180 (15 MSM geographic areas)                                          | 5%                                         | 21                                            |
| <b>Kasarani</b>        | 100 (10 MSM geographic areas)                                          | 3%                                         | 13                                            |
| <b>Total</b>           | 3640                                                                   | 100                                        | 422                                           |

131  
 132  
 133 To get the first participant from each sub-county on each day of mobilization, we had 2  
 134 sealed papers written “Yes and No”. The mobilizers issued the first two participants the  
 135 sealed papers if for example, the second participant selected “Yes”, then they were issued  
 136 with a unique identification card. Then they continued mobilizing the second participant until  
 137 the required number was attained. If the sampled participant had declined to participate, the  
 138 next exiting participant was sampled. The sampled participants were then referred to the  
 139 researcher and the research assistants for interviews at a selected venue. The selected venue  
 140 was a safe and private place identified by the mobilizers where the interviews could be  
 141 conducted; without attracting attention to the participants. At the entrance to the selected  
 142 venue, a peer navigator confirmed participant identity by confirming that they had a unique  
 143 identification card and that they were not intoxicated. Thereafter informed consent was  
 144 obtained from the participants before the questionnaire was administered. Mobilization from  
 145 the MSM geographic areas was done on 4 selected peak days (i.e., Wednesday, Friday,  
 146 Saturday and Sunday) as identified by the key population implementing partners during the

147 key population size estimate mapping(16). During that time also the peak time identified  
148 was 18.00hrs-22.00hrs and that is what we adopted. Peak day refers to a day when the  
149 number of MSM present at the MSM geographic areas was more than usual.

150  
151 **Procedure**

152 Participants were assigned a unique study identification number. Data was collected about  
153 socio-demographics and sexual behaviour including: age, marital status, religion, education  
154 level, occupation, level of income, nationality, gender identity, roles during sexual activity,  
155 sex with whom in the past 12 months, number of sexual partners in the past 12 months, type  
156 of sex, if received gifts/money in exchange for sex, whether gave gifts/money in exchange for  
157 sex and history of having ever contracted any STI.

158 To determine their understanding about STIs participants were then given a pre-tested  
159 structured questionnaire (Supplemental material). The questionnaire had four open ended  
160 questions and one short answer question. Interviewers were instructed not to prompt  
161 participants but only tally all correct responses provided. If a participant gave an incorrect  
162 answer it was ignored but if it was correct and not among the options given it was captured as  
163 other and later analysed. The lead researcher in the field did quality control checks on the  
164 questionnaires before the participant was reimbursed, allowing the team to avoid missing data  
165 or clarify ambiguities.

166 **Study Variables**

167 **Dependent variable**

168 Knowledge score was the dependent variable. In assessing knowledge levels the participants  
169 were asked the following questions; which diseases are spread via sexual intercourse? What  
170 the signs and symptoms of STIs were? How one could be infected with STIs? Can someone  
171 be infected with STIs via anal sexual intercourse? And Through which media could one get

172 infected with STIs? (Additional details are shown in the supplemental material). Interviewers  
173 were instructed not to prompt participants but only tally all correct responses provided.  
174 A knowledge score was generated by summing up the number of responses answered  
175 correctly by a participant; to give a score ranging from 0 to 29. For the purposes of analysis,  
176 we dichotomized scores as “low” and “high”, by splitting the group at  $<12$  and  $\geq 12$   
177 (additional details are shown in Appendix 1).

### 178 **Independent variables**

179 Independent variables included in this analysis included: age, marital status(single never  
180 married, married and single ever married), religion (Christians and non-Christians), education  
181 (primary, secondary and post-secondary), occupation (unemployed and employed), level of  
182 income (No income,  $<5000$ ,  $5001-10,000$ ,  $10001-15000$  and  $>15000$ ), nationality (Kenyans  
183 and non-Kenyans), gender identity (male, transgender woman, intersex and non-conforming),  
184 roles during sexual activity (top, bottom or versatile), sex with whom in the past 12 months  
185 (men or both men and women), number of sexual partners in the past 12 months (one or more  
186 than one), type of sex (vaginal, anal, oral, mutual masturbation), received gifts/money in  
187 exchange for sex (yes, all the time, yes, sometimes, No), gave gifts/money in exchange for  
188 sex (yes, all the time, yes, sometimes, No), and ever contracted STI (Yes, No) (see Table 1  
189 and 2).

### 190 **Data analysis**

191 Data was entered into statistical package for social sciences programme (IBM-SPSS) version  
192 25. Quantitative data from the study questionnaires was coded. Single data entry was done  
193 into SPSS database after quality control checks had been done. Further cleaning was carried  
194 out after data entry using frequency distributions and cross tabulations until no more errors  
195 were detected. Participant’s characteristics are presented by use of frequencies and  
196 percentages for categorical variables. Pearson’s Chi-square and Fishers exact test where

197 appropriate was done to characterize any statistical significant associations between STI  
198 knowledge, demographics and reported sexual behaviour. Variables with a  $p \leq 0.05$  and age  
199 being a priori variable were included in a multivariable logistic regression model to  
200 characterize factors associated with higher or lower participants STI knowledge.

201 **Ethical consideration and study approval number**

202 Approval of the study was sought from Kenyatta University Board of Post Graduate studies.  
203 Ethical Clearance was given by Kenyatta University ethics review committee;  
204 (PKU/1071/11121). Permission to conduct the study was sought from the National Council  
205 for Science, Technology and Innovations (NACOSTI), and from Nairobi County and sub-  
206 county facilities. Confidentiality and anonymity of the information given by the participants  
207 was protected by ensuring that the names of the participants were not indicated in the data  
208 collection tools. Participants were reimbursed in the local currency equivalent of \$2 USD in  
209 compensation for their time.

210  
211  
212  
213  
214  
215  
216  
217  
218  
219  
220  
221

222 **Results**

223 Demographics

224 A total of 404 participants were interviewed between the month of March and August 2020.  
 225 They had a mean age of 25.2 (SD=6.4) years. The majority were single never married  
 226 (80.4%; 325) and Christians (84.2%; 340). All participants had some formal education  
 227 ranging from primary to tertiary level; the majority (92.3%; 373) had secondary education or  
 228 more. Most of the participants (64.0%; 259) were employed and their level of monthly  
 229 income ranged from \$<50->150 USD. Almost all the participants (98.5%; 398) were  
 230 Kenyans. (Table 2)

231  
 232  
 233  
 234  
 235  
 236  
 237

**Table 2: Socio-demographic characteristics of study participants and their association with participant’s knowledge score.**

| Characteristics                         | Total<br>(n=404) | Knowledge score |                | P Value |
|-----------------------------------------|------------------|-----------------|----------------|---------|
|                                         |                  | <12<br>(n=215)  | ≥12<br>(n=189) |         |
|                                         | n(%)             | n(%)            | n(%)           |         |
| <b>Mean age=25.20, SD=6.41</b>          |                  |                 |                |         |
| <b>Age bracket</b>                      |                  |                 |                |         |
| 18-24                                   | 241(59.7)        | 127(52.7)       | 114(47.3)      | 0.129   |
| ≥25                                     | 163(40.3)        | 73(44.8)        | 90(55.2)       |         |
| <b>Marital Status</b>                   |                  |                 |                |         |
| Single never married                    | 325(80.4)        | 162(49.8)       | 163(50.2)      | 0.859   |
| Married                                 | 54(13.4)         | 27(50.0)        | 27(50.0)       |         |
| Single ever married                     | 25(6.2)          | 11(44.0)        | 14(56.0)       |         |
| <b>Religion</b>                         |                  |                 |                |         |
| Christian(Catholic & protestants)       | 340(84.2)        | 174(51.2)       | 166(48.8)      | 0.135   |
| Non-Christian (Muslim, Atheists, Hindu) | 64(15.8)         | 26(40.6)        | 38(59.4)       |         |
| <b>Education level</b>                  |                  |                 |                |         |
| Primary                                 | 31(7.7)          | 19(61.3)        | 12(38.7)       | 0.001   |
| Secondary                               | 226(55.9)        | 126(55.8)       | 100(44.2)      |         |
| Post-secondary                          | 147(36.4)        | 55(37.4)        | 92(62.6)       |         |

|     |                                                                                   |           |           |           |       |
|-----|-----------------------------------------------------------------------------------|-----------|-----------|-----------|-------|
| 238 | <b>Occupation</b>                                                                 |           |           |           | 0.007 |
|     | Unemployment/Student                                                              | 145(36.0) | 85(58.6)  | 60(41.4)  |       |
| 239 | Employment/Self-employed                                                          | 259(64.0) | 115(44.4) | 144(55.6) | 0.005 |
| 240 | <b>Level of income</b>                                                            |           |           |           |       |
| 241 | None                                                                              | 120(29.7) | 75(62.5)  | 45(37.5)  |       |
|     | <5000                                                                             | 54(13.4)  | 28(51.9)  | 26(48.1)  |       |
| 242 | 5001-10000                                                                        | 87(21.5)  | 38(43.7)  | 49(56.3)  |       |
|     | 10001-15000                                                                       | 71(17.6)  | 33(46.5)  | 38(53.5)  |       |
| 243 | >15000                                                                            | 72(17.8)  | 26(36.1)  | 46(63.9)  | 0.446 |
|     | <b>Nationality</b>                                                                |           |           |           |       |
| 244 | Kenyans                                                                           | 398(98.5) | 196(49.2) | 202(50.8) |       |
|     | Non-Kenyans                                                                       | 6(1.5)    | 4(66.7)   | 2(33.3)   |       |
| 245 | <b>* KEY: by Chi-square test or Fisher's Exact Test where cell size was small</b> |           |           |           |       |

246

247

248

249

250

### 251 Sexual behaviour

252 Most of the participants (90.6%; 366) self-identified as male and almost half (47.5%; 192) of  
 253 them reported to be exclusively insertive (“Top”) partners. Many (39.9%; 161) reported being  
 254 versatile (both bottom and top), while those reporting to be receptive (“Bottom”) partners  
 255 were, (12.6%; 51). In the last 12 months, (55.4%; 224) of the participants reported having sex  
 256 with men only and (44.6 %; 180) reported being bisexual. Also during that period, majority  
 257 of the participants (88.6%; 358) reported to have had more than one sexual partner (Table 2).

258

259 Majority of the respondents (93.6%; 378) reported to have had anal sex, (42.1%; 170) had  
 260 vaginal sex, (28.5%; 115) reported oral and (19.6%; 79) reported mutual masturbation.

261 Almost half (47.5%; 192) of the participants, reported receiving gifts/money in exchange for

262 sex, sometimes. Majority of the participants (95.3%; 385), engaged in transactional sex.  
 263 Participants who reported to have ever contracted STI were (43.3%; 175). (Table 3)

264 **Table 3: Sexual behavioural characteristics of study participants and their association**  
 265 **with participant's knowledge score**

| Characteristics                                                                  | Total<br>(n=404) | Knowledge score |                | P Value |
|----------------------------------------------------------------------------------|------------------|-----------------|----------------|---------|
|                                                                                  |                  | <12<br>(n=215)  | ≥12<br>(n=189) |         |
|                                                                                  | n(%)             | n(%)            | n(%)           |         |
| <b>Gender</b>                                                                    |                  |                 |                |         |
| Male                                                                             | 366(90.6)        | 176(48.1)       | 190(51.9)      | 0.364   |
| Transgender women                                                                | 13(3.2)          | 8(61.5)         | 5(38.5)        |         |
| Intersex                                                                         | 17(4.2)          | 11(64.7)        | 6(35.3)        |         |
| Non-conforming                                                                   | 8(2.0)           | 5(62.5)         | 3(37.5)        |         |
| <b>Roles during sexual activity</b>                                              |                  |                 |                |         |
| Top(Insertive)                                                                   | 192(47.5)        | 94(49.0)        | 98(51.0)       | 0.209   |
| Bottom(Receptive)                                                                | 51(12.6)         | 31(60.8)        | 20(39.2)       |         |
| Versatile (Both insertive & receptive)                                           | 161(39.9)        | 75(46.6)        | 86(53.4)       |         |
| <b>Sex with whom in the past 12 months</b>                                       |                  |                 |                |         |
| Men                                                                              | 224(55.4)        | 123(54.9)       | 101(45.1)      | 0.017   |
| Both men and women                                                               | 180(44.6)        | 77(42.8)        | 103(57.2)      |         |
| <b>Number of sexual partners in the past 12 months</b>                           |                  |                 |                |         |
| Only 1                                                                           | 46(11.4)         | 30(65.2)        | 16(34.8)       | 0.584   |
| >1                                                                               | 358(88.6)        | 170(47.5)       | 188(52.5)      |         |
| <b>Type of sex</b>                                                               |                  |                 |                |         |
| Vaginal                                                                          | 170(42.1)        | 69(72.4)        | 101(27.6)      | 0.003   |
| Anal                                                                             | 378(93.6)        | 185(48.9)       | 193(51.1)      | 0.423   |
| Oral                                                                             | 115(28.5)        | 50(43.5)        | 65(56.5)       | 0.152   |
| Mutual masturbation                                                              | 79(19.6)         | 34(43.0)        | 45(57.0)       | 0.212   |
| <b>Received gifts/money in exchange for sex</b>                                  |                  |                 |                |         |
| Yes, all the time                                                                | 38(9.4)          | 14(36.8)        | 24(63.2)       | 0.163   |
| Yes, sometimes                                                                   | 192(47.5)        | 93(48.4)        | 99(51.6)       |         |
| No                                                                               | 174(43.1)        | 93(53.4)        | 81(46.6)       |         |
| <b>Gave gifts/money in exchange for sex</b>                                      |                  |                 |                |         |
| Yes, all the time                                                                | 16(4.0)          | 5(31.3)         | 11(68.8)       | 0.337   |
| Yes, sometimes                                                                   | 139(34.4)        | 71(51.1)        | 68(48.9)       |         |
| No                                                                               | 249(61.6)        | 124(49.8)       | 125(50.2)      |         |
| <b>Ever contracted STI</b>                                                       |                  |                 |                |         |
| Yes                                                                              | 175(43.3)        | 81(46.3)        | 94(53.7)       | 0.271   |
| No                                                                               | 229(56.7)        | 119(52.0)       | 110(48.0)      |         |
| <b>*Key: by Chi-square test or Fisher's Exact Test where cell size was small</b> |                  |                 |                |         |

286

287 **STI knowledge**

288 Out of a total of 29 possible correct answers the highest participant scored 25, we observed  
289 an average score of 12.2 correct, SD 4.5 ( additional details shown in Appendix 1).As  
290 indicated on Table 4 below, majority of the participants were aware of gonorrhoea (92.8 %;  
291 375), syphilis (88.1%; 356), HIV (65.6%; 265), genital warts (33.9%; 137), Herpes Simplex (  
292 22.8%; 92), chancroid ( 20.5%;83), hepatitis B (17.3%;70), chlamydia (13.6%;55) and  
293 trichomoniasis (5.2%;21).

294 Regarding signs and symptoms of STIs, most of the participants were cognizant of penile  
295 discharge (66.8%; 270), burning sensation during urination (60.4%; 244), genital ulcer/sores  
296 (39.6%; 160), anal discharge (21.0%; 85), swelling in the groin region (23.0%; 93), anal  
297 ulcer/sore (25.0 %; 101), anal pain (21.3%; 86), and scrotal swelling (14.1%; 57).

298 Also almost all the participants knew that STIs were transmitted through unprotected sexual  
299 intercourse (97.5%; 394) i.e. vaginal, anal, oral and mutual masturbation. Also about the anal  
300 sexual intercourse risk to STIs, majority of the participants (83.7%; 338) were aware that they  
301 could be infected with STIs through unprotected anal sexual intercourse. About three quarters  
302 of the participants reported correctly that they could be infected with STIs through semen  
303 (78.0%; 315) and through blood (46.0%; 186), vaginal fluids (32.7%; 132), contaminated  
304 sharp objects (17.3%; 70) and anal fluid (29.2%; 118).

305

306

307

308

309

310

311

312

313

314 **Table 4: Proportion of participants answering STI knowledge items correctly**

|                                                                        | Proportion correct |
|------------------------------------------------------------------------|--------------------|
| <b>Sexually transmitted infections</b>                                 |                    |
| Gonorrhoea                                                             | 92.8               |
| Syphilis                                                               | 88.1               |
| HIV                                                                    | 65.6               |
| Genital warts                                                          | 33.9               |
| Herpes Simplex                                                         | 22.8               |
| Chancroid                                                              | 20.5               |
| Hepatitis B                                                            | 17.3               |
| Chlamydia                                                              | 13.6               |
| Trichomoniasis                                                         | 5.2                |
| <b>Symptomatology of STIs</b>                                          |                    |
| Penis discharge                                                        | 66.8               |
| Burning pain during urination                                          | 60.4               |
| Genital ulcer/sore                                                     | 39.6               |
| Anal ulcer/sores                                                       | 25.0               |
| Swelling in groin region                                               | 23.0               |
| Anal pain                                                              | 21.3               |
| Anal discharge                                                         | 21.0               |
| Scrotal swelling                                                       | 14.1               |
| <b>Transmission mechanism</b>                                          |                    |
| Unprotected sexual intercourse                                         | 97.5               |
| Contaminated sharp objects/wounds                                      | 5.9                |
| Blood transfusion                                                      | 3.0                |
| Unhygienic conditions                                                  | 2.2                |
| Don't know                                                             | 1.0                |
| <b>Anal intercourse exposure to STI</b>                                | 83.7               |
| <b>Transmission Media</b>                                              |                    |
| Semen                                                                  | 78.0               |
| Blood                                                                  | 46.0               |
| Vaginal fluids                                                         | 32.7               |
| Anal fluids                                                            | 29.2               |
| Contaminated sharp objects                                             | 17.3               |
| Clothing                                                               | 7.2                |
| Food                                                                   | 1.7                |
| <b>N/B- Supporting information shows how the questioned were asked</b> |                    |

315

316

317

318

319

320 **Participant characteristics independently associated with participant’s knowledge about**  
321 **STIs.**

322 The multivariable modelling revealed that participants who were aged  $\geq 25$  years were more  
323 likely to have a higher knowledge score compared with the participants who were aged 18-24  
324 years (adjusted odds ratio aOR=0.973, 95% CI 0.616-1.538). Regarding education,  
325 participants who had tertiary education were three times more likely to have a higher  
326 knowledge score compared with the participants who had primary education ( aOR=2.627,  
327 95% CI 1.142-6.043). Regarding occupation participants who were employed had a higher  
328 knowledge score compared to the ones who were not employed (aOR=0.922, 95% CI 0.401-  
329 2.117). Under level of income, participants earning Kshs 5000-10,000 were three times likely  
330 to have a higher knowledge score compared to the ones who were not earning (aOR 2.332,  
331 95% CI 0.990-6.263) . Participants who were earning Kshs >15000 (USD >150) were also  
332 three times more likely to have a higher knowledge score compared to the ones who were not  
333 earning (aOR=2.520, 95% CI 0.900-7.055). Further bisexual men were more likely to have a  
334 higher knowledge score compared with the participants who were having sex with men only (  
335 aOR= 1.550, 95% CI 1.026-2.342) (Table 5).

336  
337  
338  
339  
340  
341  
342  
343

344 **Table 5: Participant characteristics independently associated with participant’s**  
 345 **knowledge about STIs.**

| <b>Variable</b>                                                              | <b>Unadjusted Odds Ratio (95% CI</b> | <b>P-Value</b> | <b>Adjusted Odds Ratio (95% CI</b> |
|------------------------------------------------------------------------------|--------------------------------------|----------------|------------------------------------|
| <b>Age bracket Reference 18-24yrs</b>                                        |                                      | 0.129          |                                    |
| >25 yrs                                                                      | 1.373 (0.922-2.047)                  |                | 0.973 (0.616-1.538)                |
| <b>Highest reported education level Reference- “Up to completed Primary”</b> |                                      | 0.001          |                                    |
| “Up to completed Secondary                                                   | 1.257 (0.582-2.711)                  |                | 1.284 (0.575-2.865)                |
| “Up to completed Post-secondary                                              | 2.648 (1.195- 5.872)                 |                | 2.627 (1.142-6.043)                |
| <b>Occupation Reference (Not employed/student</b>                            |                                      | 0.007          |                                    |
| Employed                                                                     | 1.774 (1.176-2.677)                  |                | 0.922 (0.401-2.117)                |
| <b>Level of income Reference (No income).</b>                                |                                      | 0.005          |                                    |
| <5000                                                                        | 1.548 (0.809-2.962)                  |                | 1.857 (0.725-4.759)                |
| 5000-10000                                                                   | 2.149 (1.225-3.771)                  |                | 2.491 (0.990-6.263)                |
| 10001-15000                                                                  | 1.919 (1.059-3.480)                  |                | 1.940 (0.746-5.042)                |
| >15000                                                                       | 2.949 (1.608-5.408)                  |                | 2.520 (0.900-7.055)                |
| <b>Sex with whom Reference (Men)</b>                                         |                                      | 0.017          |                                    |
| Bisexual                                                                     | 1.629 (1.097-2.419)                  |                | 1.550 (1.026-2.342)                |

346  
 347  
 348  
 349  
 350  
 351  
 352  
 353  
 354  
 355  
 356  
 357  
 358

359 **Discussion**

360 STI knowledge and awareness is a key element towards decreasing the incidence of STIs  
361 among populations at high risk of infection. However, findings from this study among MSM  
362 in Nairobi, Kenya, demonstrated low STI knowledge.

363 Participants in this study who reported HIV as one of the STIs were less compared to the one  
364 who reported Gonorrhoea and Syphilis. It's expected that all the participants should be aware  
365 of it because HIV has no cure and it has caused devastating effects globally(18). This  
366 disconnect among some of the participants could be because patients on antiretroviral drugs  
367 look healthy. This has changed the perception of HIV/AIDS from a very fatal to a chronic  
368 and potentially manageable disease. Also the availability and administration of antiretroviral  
369 therapy has significantly reduced mortality and morbidity linked with HIV and AIDS(19).  
370 This disconnect of HIV as one of the STIs among some of the participants is worthy worrying  
371 about; because the progress that has been made to curb the spread of HIV might be futile.  
372 HCWs need to continue emphasizing to STI patients and other people in the society that HIV  
373 is one of the STIs and it has no cure. Being infected by other STIs such as Herpes Simplex  
374 Virus type 2 (HSV-2) and Syphilis infections puts them at a higher risk of being infected by  
375 HIV (3,4).

376 Others have found similar results; a study conducted among sixty racially –and ethnically  
377 diverse MSM and transgender women had also reported that the participants had low  
378 knowledge about STIs (20). Also another study conducted among 50 at risk MSM at Boston  
379 USA had found that the MSM lacked knowledge about the signs and symptoms of STDs  
380 (21). However, worth noting is that the measures of STI knowledge used on the above past  
381 studies varied greatly from those used in our survey. There is need for the participants to be  
382 health educated about STIs as some studies have revealed that patients who are enlightened  
383 have higher probability of seeking health care services compared to the once who are not

384 (22). By them seeking treatment it can help stop the transmission of STI to others. To take  
385 care of the asymptomatic STIs; quarterly STI screening should be encouraged among MSM  
386 who are at risk of STIs.

387 In this study some of our participants reported of having oral sexual intercourse. Therefore,  
388 there is need for at least annual screening of extra-genital sites (rectum and pharynx) among  
389 sexually active MSM(23); so that, the extra-genital STIs cannot be missed out.

390 This study did not reveal statistical significant association between knowledge of the MSM  
391 and their age. Others have found similar results too; a study that was conducted among MSM  
392 in Ireland reported that participants who were aged 18-24 years of age had lower knowledge  
393 about STIs compared with the older MSM (24). Low knowledge about STIs among the  
394 youth could be occasioned by government policies and laws that criminalize key population  
395 behaviours and by education and health systems that pay no attention to or reject them(6).

396 Participants who had tertiary education were three times more likely to have a higher  
397 knowledge score compared with the participants who had primary education. Consistent with  
398 our findings is a study which was conducted in Melaka Malaysia; they found that  
399 participants who were studying in a degree program were two times more likely to be  
400 knowledgeable about STIs than the one who were not (25)

401 Further this study revealed that sexual behaviour of the study participants in terms of sex with  
402 whom, bisexual men had higher odds of knowledge about STIs compared to gay men. These  
403 findings are contrary to (26,27) who reported that bisexual men had limited availability of  
404 culturally sensitive education materials or health information that is specifically targeted to  
405 their needs. However, their settings are different from our Kenyan context.

406 Also majority of the participants had more than one sexual partner. Contrary to our findings,  
407 a study which was conducted among MSM in UK revealed that men who were  
408 knowledgeable about STI had more sexual partners. The authors of that study suggested that,

409 in addition to knowledge, behaviours were determined by a complex range of psychological  
410 and eco-social factors (28). Still consistent with the UK study is a study which was conducted  
411 among 772 subjects in Estonia. They found that higher knowledge scores were not associated  
412 with lower HIV infection rates (29). This affirms that while knowledge is a key component of  
413 behaviour change models, by itself it is often insufficient to effect behaviour change. Models  
414 such as the Information-Behavioural Skills Model suggest that to take steps to reduce risk of  
415 STI infection, individuals would need not only knowledge about STIs, but also motivation to  
416 prevent it and the skills necessary to implement risk reduction actions, such as getting  
417 regularly tested for STIs (30).

#### 418 **Limitations**

419 Our study has several limitations. Our sample represents those men who seek sex at selected  
420 geographic areas in Nairobi, and may not be representative of MSM, but otherwise do not  
421 visit these areas. However, our aim was to enrol very high at risk individuals.

422 Our data are cross sectional, and as such we cannot infer causality between our independent  
423 variables and our dependent variable, knowledge of STIs.

#### 424 **Implications to programmes**

425 Individual health education and psychological approaches help an individual to acquire  
426 knowledge and skills to enact new behaviours to reduce risk (31). In this study participants  
427 had low knowledge about STIs and majority of them had more than one sexual partner. We  
428 do recommend HCWs to continue giving health talks about STIs to MSM during their health  
429 facility visits and in any other forums to enlighten them about STIs. Also because other  
430 studies have reported that knowledge alone is often insufficient to effect behaviour change.  
431 There is need for active follow-up of high risk individuals to prevent STIs which can be done  
432 by;

433 Recalling of MSM for follow-ups, who report engaging in high risk sexual behaviours via  
434 phone calls, peer leaders or community health works and creating demand for STI prevention  
435 cascade. Also bulky short messages reminder for offering STI testing to high risk MSM can  
436 be facilitated by using prompts incorporated within electronic MSM records.

437 On the other hand because there is a higher likelihood of extra-genital STIs being missed out  
438 by both the patient and clinicians; there is need for at least annual screening of extra-genital  
439 sites (rectum and pharynx) among sexually active MSM.

440 Also because asymptomatic STIs can be missed out due to syndromic management of STIs;  
441 we recommend quarterly STI screening for individuals who are at risk so that the  
442 asymptomatic STIs can be detected and treated to curb the spread of STIs.

#### 443 **Implications to Policy Makers**

444 Clear policies and guidelines should be put in place to enable HCWs to know what to do once  
445 an individual has self-identified himself as MSM. For instance, MSM can be linked to  
446 programmes or health facilities that can follow them up for possible regular screening and  
447 treatment of STIs.

448 Self-testing for STIs allows convenience, privacy and gives the patient an opportunity to  
449 avoid embarrassment while still accessing STI care. So they can implement the use of self-  
450 sampling kits for various STI testing as another study reported that HIV self-testing was  
451 accepted by similar populations (32).

#### 452 **Conclusion**

453 Participant's knowledge level regarding STIs was low. Even though other studies have  
454 reported that individuals to reduce risk of STI infection would need not only knowledge  
455 about STIs. Still we recommend HCWs to continue educating patients about STIs. This is  
456 because patients who are enlightened have a higher probability of seeking health care

457 services compared to the once who are not. Hence stop further spread of the STIs to their  
458 sexual partners.

459

## 460 **Supporting Information**

461 **Supplemental questionnaire:** indicating the questions assessing participant's knowledge  
462 levels.

463

## 464 **Acknowledgements**

465 This work was partially funded by IAVI with the generous support of USAID and other  
466 donors; a full list of IAVI donors is available at [www.iavi.org](http://www.iavi.org). The contents of this  
467 manuscript are the responsibility of IAVI and co-authors and do not necessarily reflect the  
468 views of USAID or the US Government. We would like to acknowledge the participants and  
469 the research assistants who assisted in data collection. We also appreciate Kenneth Ekoru  
470 from the imperial university and Janet Muasya from the University of Nairobi for their input  
471 in the data analysis.

472

## 473 **Author Contributions**

474 **Conceptualization:** Delvin Kwamboka Nyasani

475 **Data curation:** Delvin Kwamboka Nyasani and Laura Lunani Lusike

476 **Formal analysis:** Justus.O.Osero and Laura Lunani Lusike

477 **Funding acquisition:** Delvin Kwamboka Nyasani

478 **Project Administration:** Justus.O.Osero and Meshack Onyambu

479 **Resources:**

480 **Supervision:** Justus.O.Osero and Meshack Onyambu

481 **Validation:** Matthew A. Price and Gaundensia Nzembi Mutua

482 **Writing original draft:** Delvin Kwamboka Nyasani

483 **Writing, review & editing:** Delvin Kwamboka Nyasani, Justus.O.Osero, Meshack

484 Onyambu, Geoffrey Oino Ombati, Matthew A. Price and Gaundensia Nzembi Mutua.

485

486 **Appendix 1: Knowledge assessment score of study participants**

| <b>Knowledge Score</b>      |                            |                         |                                    |
|-----------------------------|----------------------------|-------------------------|------------------------------------|
| <b>Mean=12.25,</b>          |                            | <b>Median=12.00</b>     |                                    |
| <b>No. of right answers</b> | <b>No. of participants</b> | <b>Score percentage</b> | <b>Cumulative score percentage</b> |
| 3                           | 1                          | .2                      | .2                                 |
| 4                           | 5                          | 1.2                     | 1.5                                |
| 5                           | 5                          | 1.2                     | 2.7                                |
| 6                           | 16                         | 3.9                     | 6.7                                |
| 7                           | 24                         | 5.9                     | 12.6                               |
| 8                           | 30                         | 7.4                     | 20.0                               |
| 9                           | 36                         | 8.9                     | 28.8                               |
| 10                          | 40                         | 9.9                     | 38.7                               |
| 11                          | 44                         | 10.8                    | 49.5                               |
| 12                          | 33                         | 8.1                     | 57.6                               |
| 13                          | 32                         | 7.9                     | 65.5                               |
| 14                          | 46                         | 11.3                    | 76.8                               |
| 15                          | 15                         | 3.7                     | 80.5                               |
| 16                          | 15                         | 3.7                     | 84.2                               |
| 17                          | 12                         | 3.0                     | 87.2                               |
| 18                          | 14                         | 3.4                     | 90.6                               |
| 19                          | 8                          | 2.0                     | 92.6                               |
| 20                          | 5                          | 1.2                     | 93.8                               |
| 21                          | 3                          | .7                      | 94.6                               |
| 22                          | 5                          | 1.2                     | 95.8                               |
| 23                          | 5                          | 1.2                     | 97.0                               |
| 24                          | 4                          | 1.0                     | 98.0                               |
| 25                          | 8                          | 2.0                     | 100.0                              |
| Total                       | 406                        | 100.0                   |                                    |

487

488

489

490

491

492

493 **References**

- 494 1. World Health Organization (WHO) 2021. World Health Organization (WHO), Sexually  
495 Transmitted Infections 2021. 2021.
- 496 2. World Health Organization (WHO 2021 ). Guidelines for the Management of Sexually  
497 Transmitted Infections. 2021.
- 498 3. Centres for Disease Control and Prevention. Sexually transmitted disease surveillance 2010.  
499 Sexually Transmitted Disease Surveillance 2011. 2011;
- 500 4. Kidd S, Torrone E, Su J, Weinstock H. Reported Primary and Secondary Syphilis Cases in the  
501 United States: Implications for HIV Infection. *Sex Transm Dis.* 2018 Sep;45(9):S42–7.
- 502 5. Newman L, Rowley J, Vander Hoorn S, Wijesooriya NS, Unemo M, Low N, et al. Global Estimates  
503 of the Prevalence and Incidence of Four Curable Sexually Transmitted Infections in 2012 Based  
504 on Systematic Review and Global Reporting. *PLoS One.* 2015;10(12):e0143304.
- 505 6. WHO 2016. Global Health Sector Strategy on Sexually Transmitted Infections 2016-2021  
506 Towards Ending STIs. 2016.
- 507 7. Smith DK, Grohskopf LA, Black RJ, Auerbach JD, Veronese F, Struble KA, et al. Antiretroviral  
508 postexposure prophylaxis after sexual, injection-drug use, or other nonoccupational exposure to  
509 HIV in the United States: recommendations from the U.S. Department of Health and Human  
510 Services. *MMWR Recomm Rep Morb Mortal Wkly Rep Recomm Rep.* 2005 Jan 21;54(RR-2):1–20.
- 511 8. Centres for Disease Control & prevention. Centres for Disease Control & Prevention.HIV  
512 Surveillance Report. 2018.
- 513 9. Public Health England. Public Health England.Sexually transmitted infections and screening for  
514 Chlamydia i England. England; 2017.
- 515 10. Purcell DW, Johnson CH, Lansky A, Prejean J, Stein R, Denning P, et al. Estimating the population  
516 size of men who have sex with men in the United States to obtain HIV and syphilis rates. *Open  
517 AIDS J.* 2012;6:98–107.
- 518 11. Scott-Sheldon LAJ CP, Chan PA. Increasing Sexually Transmitted Infections in the U.S.:A Call for  
519 Action for Research,Clinical, and Public Health Practice. *Arch Sex Behav.* 2019;
- 520 12. Hladik W, Barker J, Ssenkusu JM, Opio A, Tappero JW, Hakim A, et al. HIV Infection among Men  
521 Who Have Sex with Men in Kampala, Uganda—A Respondent Driven Sampling Survey. *PLoS ONE*  
522 [Internet]. 2012 May 31;7(5). Available from:  
523 <https://www.ncbi.nlm.nih.gov/pmc/articles/PMC3364961/>
- 524 13. Muraguri N, Tun W, Okal J, Broz D, Raymond HF, Kellogg T, et al. HIV and STI Prevalence and Risk  
525 Factors Among Male Sex Workers and Other Men Who Have Sex With Men in Nairobi, Kenya.  
526 *JAIDS J Acquir Immune Defic Syndr.* 2015 Jan 1;68(1):91.
- 527 14. Ministry of Health & National AIDS Control Council 2016. Kenya AIDS Response Progress Report  
528 2016. 2016.

- 529 15. Seidu AA, Ahinkorah BO, Dadzie LK, Tetteh JK, Agbaglo E, Okyere J, et al. A multi-country cross-  
530 sectional study of self-reported sexually transmitted infections among sexually active men in  
531 sub-Saharan Africa. *BMC Public Health*. 2020 Dec 7;20(1):1884.
- 532 16. National Aids and STI Control Programme (NASCOP). Key Population Mapping and Size  
533 Estimation in Selected Counties in Kenya: Phase 1 Key Findings, Kenya. Phase 1. Kenya; 2019.
- 534 17. Mutisya EM, Mutua G, Nyasani D, Nduta H, Kabuti RW, Muturi-Kioi V, et al. Willingness to  
535 participate in future HIV vaccine trials among men who have sex with men and female sex  
536 workers living in Nairobi, Kenya. *PloS One*. 2020;15(8):e0238028.
- 537 18. UNAIDS 2020. Global AIDS Update: Seizing the Moment; July 2020. UNAIDS. AIDSinfo website;  
538 accessed July 2020, available at: <http://aidsinfo.unaids.org/>. UNAIDS. Core Epidemiology Slides;  
539 July 2020. 2020.
- 540 19. Oguntibeju OO. Quality of life of people living with HIV and AIDS and antiretroviral therapy.  
541 *HIVAIDS Auckl NZ*. 2012;4:117–24.
- 542 20. Balán IC, Lopez-Rios J, Dolezal C, Rael CT, Lentz C. Low STI Knowledge, Risk Perception, and  
543 Concern about Infection among Men Who Have Sex with Men and Transgender Women at High  
544 Risk of Infection. *Sex Health*. 2019 Nov;16(6):580–6.
- 545 21. Mimiaga MJ, Goldhammer H, Belanoff C, Tetu AM, Mayer KH. Men who have sex with men:  
546 perceptions about sexual risk, HIV and sexually transmitted disease testing, and provider  
547 communication. *Sex Transm Dis*. 2007 Feb;34(2):113–9.
- 548 22. O'Donnell O (2018). Access to health care in developing countries:breaking down demand-side  
549 barriers.Utilization of Health and Medical Services:Factors influencinghealth care seeking  
550 behaviour and unmet needs in rural areas of Kenya. Theses DR.Masters.2007. [Kenya]; 2018.
- 551 23. Kimberly A. Workowski, Gail A. Bolan,. Sexually Transmitted Diseases Treatment Guidelines,  
552 2015 [Internet]. 2015 [cited 2022 Oct 13]. Available from:  
553 <https://www.cdc.gov/mmwr/preview/mmwrhtml/rr6403a1.htm>
- 554 24. Carey C, O'Donnell K, Davoren M, Quinlan M, Igoe D, Barrett P. Factors associated with lower  
555 knowledge of HIV and STI transmission, testing and treatment among MSM in Ireland: findings  
556 from the MSM Internet Survey Ireland (MISI) 2015. *Sex Transm Infect*. 2021 Aug 1;97(5):351.
- 557 25. Mansor N, Ahmad N, Rahman HA. Determinants of knowledge on sexually transmitted infections  
558 among students in public higher education institutions in Melaka state, Malaysia. *PLOS ONE*.  
559 2020 Oct 29;15(10):e0240842.
- 560 26. Daneback K, Ross MW, Månsson SA. Bisexuality and Sexually Related Activities on the Internet. *J*  
561 *Bisexuality*. 2008 Sep 1;8(1–2):115–29.
- 562 27. Feinstein BA, Dodge B. Meeting the sexual health needs of bisexual men in the age of  
563 biomedical HIV prevention: Gaps and priorities. *Arch Sex Behav*. 2020 Jan;49(1):217–32.
- 564 28. Wayal S, Reid D, Weatherburn P, Blomquist P, Fabiane S, Hughes G, et al. Association between  
565 knowledge, risk behaviours, and testing for sexually transmitted infections among men who  
566 have sex with men: findings from a large online survey in the United Kingdom. *HIV Med*. 2019  
567 Sep;20(8):523–33.

- 568 29. Parker RD, Rüütel K. Associations of high-risk behaviour and HIV status with HIV knowledge  
569 among persons in Tallinn, Estonia. *Scand J Public Health*. 2010 Nov 1;38(7):748–55.
- 570 30. Balán IC, Lopez-Rios J, Dolezal C, Rael CT, Lentz C. Low sexually transmissible infection  
571 knowledge, risk perception and concern about infection among men who have sex with men  
572 and transgender women at high risk of infection. *Sex Health*. 2019 Nov;16(6):580–6.
- 573 31. Holtgrave DR, Qualls NL, Curran JW, Valdiserri RO, Guinan ME, Parra WC. An overview of the  
574 effectiveness and efficiency of HIV prevention programs. *Public Health Rep Wash DC* 1974. 1995  
575 Apr;110(2):134–46.
- 576 32. Figueroa C, Johnson C, Verster A, Baggaley R. Attitudes and Acceptability on HIV Self-testing  
577 Among Key Populations: A Literature Review. *AIDS Behav*. 2015 Nov;19(11):1949–65.
- 578
